# Supplementary material for: Absolute and Relative Agreement between the Current and Modified Brazilian Cardioprotective Nutritional Program Dietary Index (BALANCE DI) and the American Heart Association Healthy Diet Score (AHA-DS) in Post Myocardial Infarction Patients
Source: MDPI journal article supplement (doi:10.3390/nu14071378), 2022-03-25
Supplement: s1 [file s1]

**Table S1.** BALANCE food group composition

| Food group | Foods                                                   |
|------------|---------------------------------------------------------|
| Green      | Vegetables, fruits, beans and legumes, low-fat milk     |
| Yellow     | Rice, bread, pasta, oats, couscous, nuts, vegetable oil |
| Blue       | Meat, fish, cheese, eggs                                |
| Red        | Ultra-processed foods                                   |

BALANCE: Brazilian Cardioprotective Nutritional Program.

**Table S2.** BALANCE caloric ranges and recommended intake of food groups

| Caloric range (Kcal) | Recommended intake |        |      |
|----------------------|--------------------|--------|------|
|                      | Green              | Yellow | Blue |
| 1,400                | 9                  | 6      | 2    |
| 1,600                | 11                 | 7      | 2    |
| 1,800                | 11                 | 9      | 3    |
| 2,000                | 12                 | 10     | 3    |
| 2,200                | 14                 | 11     | 4    |
| 2,400                | 16                 | 13     | 4    |

BALANCE: Brazilian Cardioprotective Nutritional Program. Adapted from Marcadenti et al, 2021 [1].

**Table S3.** Scoring criteria for the BALANCE DI

| Index component<br>(BALANCE food group) | Criteria for 0 point              | Criteria for 10 points    |
|-----------------------------------------|-----------------------------------|---------------------------|
| Green                                   | 0                                 | $\geq$ the recommendation |
| Yellow                                  | 50% $>$ or $<$ the recommendation | = the recommendation      |
| Blue                                    | $\geq 2$ beyond the recommended   | $\leq$ the recommendation |
| Red                                     | $\geq 4$                          | $\leq 0$                  |
| <b>Total score (range)</b>              | <b>0</b>                          | <b>40</b>                 |

BALANCE DI: Brazilian Cardioprotective Nutritional Program Dietary Index; BALANCE: Brazilian Cardioprotective Nutritional Program. Adapted from Tereza da Silva et al, 2018 [2].

**Table S4.** AHA Dietary Targets and Healthy Diet Score for Defining Cardiovascular Health

| AHA Target                       |                                                           | Consumption Range for<br>Alternative Healthy Diet<br>Score | Alternative Scoring<br>Range        |
|----------------------------------|-----------------------------------------------------------|------------------------------------------------------------|-------------------------------------|
| <b>Primary dietary metrics</b>   |                                                           |                                                            |                                     |
| Fruits and vegetables            | $\geq 4.5$ cups/d                                         | 0 to $\geq 4.5$ cups/d                                     | 0–10                                |
| Fish and shellfish               | 2 or more 3.5-oz servings/wk ( $\geq 200$ g/wk)           | 0 to $\geq 7$ oz/wk                                        | 0–10                                |
| Sodium                           | $\leq 1500$ mg/d                                          | $\leq 1500$ to $> 4500$ mg/d                               | 10–0                                |
| Sugar-sweetened beverages.       | $\leq 36$ fl oz/wk                                        | $\leq 36$ to $> 210$ fl oz/wk                              | 10–0                                |
| Whole grains                     | 3 or more 1-oz-equivalent servings/d                      | 0 to $\geq 3$ oz/d                                         | 0–10                                |
| <b>Secondary dietary metrics</b> |                                                           |                                                            |                                     |
| Nuts, seeds, and legumes         | $\geq 4$ servings/wk (nuts/seeds: 1 oz; legumes: 1/2 cup) | 0 to $\geq 4$ servings/d                                   | 0–10                                |
| Processed meats                  | 2 or fewer 1.75-oz servings/wk ( $\leq 100$ g/wk)         | $\leq 3.5$ to $> 17.5$ oz/wk                               | 10–0                                |
| Saturated fat                    | $\leq 7\%$ energy                                         | $\leq 7$ to $> 15$ (% energy)                              | 10–0                                |
| AHA-DS (primary)                 | Ideal: 4 or 5 dietary targets ( $\geq 80\%$ )             | Sum of scores for primary<br>metrics                       | 0 (worst) to 100 (best)             |
|                                  | Intermediate: 2 or 3 dietary targets (40%–79%)            |                                                            | Ideal: 80–100                       |
|                                  | Poor: $< 2$ dietary targets ( $< 40\%$ )                  |                                                            | Intermediate: 40–79<br>Poor: $< 40$ |
| AHA-DS (secondary)               | Ideal: 4 or 5 dietary targets ( $\geq 80\%$ )             | Sum of scores for primary<br>and secondary metrics         | 0 (worst) to 100 (best)             |
|                                  | Intermediate: 2 or 3 dietary targets (40%–79%)            |                                                            | Ideal: 80–100                       |
|                                  | Poor: $< 2$ dietary targets ( $< 40\%$ )                  |                                                            | Intermediate: 40–79<br>Poor: $< 40$ |

AHA-DS: American Heart Association diet score; wk: week; oz: ounces; d: day. Adapted from Virani et al, 2020 [3].

**Table S5.** Foods items from the FFQ and mean cup for the scoring system for AHA-DS components measured in cups/day.

| AHA-DS component         | FFQ item                                                            | Mean cup** |
|--------------------------|---------------------------------------------------------------------|------------|
| Nuts, seeds, and legumes | Beans (carioca, purple, black, green) (g)                           | 240        |
|                          | Lentil, meatless peas (g)                                           | 179        |
|                          | Chickpeas, soybeans (g)                                             | 168        |
|                          | Brazilian black beans stew, bean stew (20% from total consumption)* | 246        |
|                          | (g)                                                                 |            |

\*Considering a traditional recipe extracted from the Brazilian table TACO<sup>4</sup> (*Tabela Brasileira de Composição de Alimentos*) we consider 20% of the consumption as legumes; \*\*United States Department of Agriculture (USDA)<sup>5</sup>. FFQ: food frequency questionnaire; AHA-DS: American Heart Association Diet Score.

**Table S6.** Foods from the FFQ for the scoring system for AHA-DS components measured in g/week, oz/week, and oz-equivalent servings/day

| AHA-DS component (measure)  | FFQ item                                                                                                                                                                                                                                                    |
|-----------------------------|-------------------------------------------------------------------------------------------------------------------------------------------------------------------------------------------------------------------------------------------------------------|
| Fish and shellfish (g/week) | Fish (boiled, fried, roasted) and seafood                                                                                                                                                                                                                   |
| SSBs (oz/week)              | Industrialized juice<br>Soda (common, diet, light)<br>Chocolate-flavored beverage mix (mixed with milk)                                                                                                                                                     |
| Processed meats (g/week)    | Jerked meat<br>Bacon and Cold cuts (ham/mortadella/salami/frankfurter)<br>Burger, nuggets, meatball (industrialized)<br>Brazilian black beans stew, bean stew (10% from total consumption)*<br>Sandwich (hot dog, hamburger) (67% from total consumption)** |

\* Considering a traditional recipe extracted from the Brazilian table TACO<sup>4</sup> (*Tabela Brasileira de Composição de Alimentos*) we consider 10% of the consumption as processed meats; \*\* Considering the meat content of hot dogs and hamburger according to USDA<sup>5</sup> Food Central data. FFQ: food frequency questionnaire; AHA-DS: American Heart Association Diet Score; SSB: sugar sweetened beverages.

**Table S7.** Pearson correlations and mean differences between the AHA-DS and the BALANCE DI (n=473)

| AHA-DS  | BALANCE DI                        |         |                                    |
|---------|-----------------------------------|---------|------------------------------------|
|         | Pearson's correlation coefficient | p-value | Mean difference (percent [95% CI]) |
| Primary | 0.28                              | <0.0001 | 16 (14 - 18)                       |
| Total   | 0.46                              | <0.0001 | 8 (7-10)                           |

AHA-DS: American Heart Association Diet Score; BALANCE DI: Brazilian Cardioprotective Nutritional Program Dietary Index.

**Table S8.** Weighted kappa on quintile rankings of agreement between the BALANCE DI, the primary and the total AHA-DS

| AHA-DS         |            | BALANCE DI |            |            |            |            | Total   |
|----------------|------------|------------|------------|------------|------------|------------|---------|
|                |            | Q1<br>n(%) | Q2<br>n(%) | Q3<br>n(%) | Q4<br>n(%) | Q5<br>n(%) |         |
| Primary AHA-DS | Q1<br>n(%) | 28(30)     | 22(23)     | 18(19)     | 13(14)     | 13(14)     | 94(100) |
|                | Q2<br>n(%) | 25(26)     | 22(23)     | 17(18)     | 20(21)     | 11(12)     | 95(100) |
|                | Q3<br>n(%) | 15(16)     | 21(22)     | 17(18)     | 24(25)     | 18(19)     | 95(100) |
|                | Q4<br>n(%) | 15(16)     | 18(19)     | 23(24)     | 15(16)     | 24(25)     | 95(100) |
|                | Q5<br>n(%) | 11(12)     | 12(13)     | 20(21)     | 23(24)     | 28(30)     | 94(100) |
|                | Total      | 94(100)    | 95(100)    | 95(100)    | 95(100)    | 94(100)    |         |
| Total AHA-DS   | Q1<br>n(%) | 40(43)     | 23(24)     | 17(18)     | 12(13)     | 2(2)       | 94(100) |
|                | Q2<br>n(%) | 22(23)     | 23(24)     | 21(22)     | 13(14)     | 16(17)     | 95(100) |
|                | Q3<br>n(%) | 17(18)     | 18(19)     | 17(18)     | 25(26)     | 18(19)     | 95(100) |
|                | Q4<br>n(%) | 10(11)     | 24(25)     | 18(19)     | 21(22)     | 22(23)     | 95(100) |
|                | Q5<br>n(%) | 5(5)       | 7(8)       | 22(23)     | 24(25)     | 36(38)     | 94(100) |
|                | Total      | 94(100)    | 95(100)    | 95(100)    | 95(100)    | 94(100)    |         |

BALANCE DI: Brazilian Cardioprotective Nutritional Program Dietary Index; AHA-DS: American Heart Association Diet Score.

**Table S9.** Pearson correlations and mean differences between the AHA-DS and the New BALANCE DI (n=473)

| AHA-DS    | New BALANCE DI                    |         |                                    |
|-----------|-----------------------------------|---------|------------------------------------|
|           | Pearson’s correlation coefficient | p-value | Mean difference (percent [95% CI]) |
| Primary   | 0.59                              | <0.0001 | 16 (14 – 18)                       |
| Secondary | 0.64                              | <0.0001 | 8 (7 – 10)                         |

AHA-DS: American Heart Association Diet Score; New BALANCE DI: New Brazilian Cardioprotective Diet Dietary Index.

**Table S10.** Weighted kappa on quintile rankings of agreement between the New BALANCE DI, the primary and the total AHA-DS

| AHA-DS         |            | New BALANCE DI |            |            |            |            | Total   |
|----------------|------------|----------------|------------|------------|------------|------------|---------|
|                |            | Q1<br>n(%)     | Q2<br>n(%) | Q3<br>n(%) | Q4<br>n(%) | Q5<br>n(%) |         |
| Primary AHA-DS | Q1<br>n(%) | 43(46)         | 24(25)     | 15(16)     | 10(11)     | 2(2)       | 94(100) |
|                | Q2<br>n(%) | 33(35)         | 22(23)     | 23(24)     | 15(16)     | 2(2)       | 95(100) |
|                | Q3<br>n(%) | 15(16)         | 20(21)     | 24(25)     | 23(24)     | 13(14)     | 95(100) |
|                | Q4<br>n(%) | 4(4)           | 17(18)     | 19(20)     | 29(31)     | 26(27)     | 95(100) |
|                | Q5<br>n(%) | 1(1)           | 10(11)     | 14(15)     | 18(20)     | 51(54)     | 94(100) |
| Total          |            | 96(100)        | 93(100)    | 95(100)    | 95(100)    | 94(100)    |         |
| Total AHA-DS   | Q1<br>n(%) | 49(52)         | 26(28)     | 14(15)     | 4(4)       | 1(1)       | 94(100) |
|                | Q2<br>n(%) | 24(25)         | 24(26)     | 24(25)     | 17(18)     | 6(6)       | 95(100) |
|                | Q3<br>n(%) | 14(15)         | 19(20)     | 29(30)     | 25(26)     | 8(8)       | 95(100) |
|                | Q4<br>n(%) | 8(8)           | 16(17)     | 17(18)     | 23(24)     | 31(33)     | 95(100) |
|                | Q5<br>n(%) | 1(1)           | 8(8)       | 11(12)     | 26(28)     | 48(51)     | 94(100) |
| Total          |            | 96(100)        | 93(100)    | 95(100)    | 95(100)    | 94(100)    |         |

BALANCE DI: Brazilian Cardioprotective Nutritional Program Dietary Index; AHA-DS: American Heart Association Diet Score.

## References

1. Marcadenti, A.; Weber, B.; Bersch-Ferreira, A. C.; Machado, R.; Torreglosa, C. R.; de Sousa Lara, E. M.; da Silva, L. R.; Santos, R.; Miyada, D.; Sady, E.; et al. Effects of a Brazilian cardioprotective diet and nuts on cardiometabolic parameters after myocardial infarction: study protocol for a randomized controlled clinical trial. *Trials* **2021**, 22, 582; DOI: 10.1186/s13063-021-05494-0.
2. Tereza da Silva, J.; Bersch-Ferreira, Â.C.; Torreglosa, C.R.; Weber, B.; Levy, R.B. Development of a dietary index based on the Brazilian Cardioprotective Nutritional Program (BALANCE). *Nutr. J.* **2018**, 4, 17-49; DOI: 10.1186/s12937-018-0359-5.
3. Virani, S. S.; Alonso, A.; Benjamin, E. J.; Bittencourt, M. S.; Callaway, C. W.; Carson, A. P.; Chamberlain, A. M.; Chang, A. R.; Cheng, S.; Delling, F. N.; et al. Heart Disease and Stroke Statistics-2020 Update: A Report From the American Heart Association. *Circulation* **2020**, 141, e139–e596; DOI: 10.1161/CIR.0000000000000757.
4. Tabela Brasileira de Composição de Alimentos. 4<sup>a</sup> ed. rev. e ampl. Campinas: NEPA-UNICAMP, **2011**.
5. United States Department Of Agriculture (USDA). Available online: <http://www.usda.gov>. (Assessed on 01/11/2021).
